# Supplementary material
Source: publisher figshare collection journal article supplement (https://scielo.figshare.com/articles/dataset/_/6083477)
Supplement: Supplementary file 1 [file Table_1.xls]

## Sheet: Table_1
<b>Plot</b>	<b>Chemical analysis</b>
	pH	M.O.	P Resin	K	Ca	Mg	H+Al	SB	T	V (%)
	(CaCl<sub>2</sub>)	(g dm<sup>-3</sup>)	(mg dm<sup>-</sup>³)	(mmol<sub>c</sub> dm<sup>-</sup>³)
35 DAD	6	30	77	2.8	52	26	22	80.8	102.8	79
28 DAD	5.7	30	62	2.4	41	18	28	61.4	89.4	69
21 DAD	5.7	29	64	1.3	44	20	28	65.3	93.3	70
14 DAD	5.6	28	64	0.8	47	21	28	68.8	96.8	71
7 DAD	5.8	29	64	0.5	51	20	28	71.5	99.5	72
0 DAD	6	26	78	0.2	48	19	22	67.2	89.2	75
Contr.	6.1	26	66	0.7	54	28	20	82.7	102.7	81
Physical analysis
Clay		Loam	Sand			Textural Class
			Fine	Coarse
g kg<sup>-1</sup>
543		197	160	100		Clayey
