# Supplementary material
Source: publisher figshare collection journal article supplement (https://scielo.figshare.com/articles/dataset/_/6083477)
Supplement: Supplementary file 2 [file Table_2.xls]

## Sheet: Table_2
<b>Treatment</b>	<b>Height 30 DAP</b>	<b>Height 60 DAP</b>	<b>Height 90 DAP</b>	<b>Diameter 30 DAP</b>	<b>Diameter 60 DAP</b>	<b>Diameter 90 DAP</b>
Without straw	38.6 B	57.5 B	112.5 B	3.45 B	6.65 B	12.77 B
0 DAD	35.5 B	46.2 B	94.5 B	3.16 B	4.34 C	9.39 C
7 DAD	38.8 B	54.2 B	126.7 B	3.13 B	5.27 B	12.95 B
14 DAD	42.4 B	70.6 B	145.0 A	3.51 B	9.88 A	15.85 B
21 DAD	45.1 B	81.8 B	117.2 A	4.02 B	10.18 A	19.14 A
28 DAD	46.7 A	99.2 A	164.6 A	4.66 A	10.95 A	18.66 A
35 DAD	45.4 B	93.1 A	152.5 A	4.52 A	10.76 A	18.16 A
F (Treat)	5.31**	9.51**	21.48**	6.88**	26.97**	23.27**
VC (%)	10.59	22.01	10.84	15.01	16.21	12.88
