# Supplementary material
Source: publisher figshare collection journal article supplement (https://scielo.figshare.com/articles/dataset/_/6083477)
Supplement: Supplementary file 3 [file Table_3.xls]

## Sheet: Table_3
<b>Variable</b>	<b>Without straw</b>	<b>0 DAD</b>	<b>7 DAD</b>	<b>14 DAD</b>	<b>21 DAD</b>	<b>28 DAD</b>	<b>35 DAD</b>	<b>F (Treat)</b>	<b>VC (%)</b>
DMLeaves	45.8 B	22.3 C	40.6 B	74.8 A	95.2 A	106.0 A	102.4 A	33.06**	21.44
DMStem	45.3 B	35.5 B	42.4 B	84.1 A	116.5 A	120.1 A	107.5 A	20.04**	24.64
Leaf area	84.1 B	50.1 B	87.7 B	146.2 A	192.0 A	187.7 A	175.1 A	35.29**	18.78
